# Supplementary material for: Kcnh1 Voltage-gated Potassium Channels Are Essential for Early Zebrafish Development
Source: PubMed Central journal article supplement — J Biol Chem. 2012 Aug 27;287(42):35565–75. doi: 10.1074/jbc.M112.363978 (PMC3471731; doi:10.1074/jbc.m112.363978), 2012-08-27
Supplement: supp_M112.363978_jbc.M112.363978-1.pdf [file supp_M112.363978_jbc.M112.363978-1.pdf]

**Supplementary Table 1. qPCR primers used in this study**

| <b>Gene</b>   | <b>Primer forward 5'&gt;...&gt;3'</b> | <b>Primer reverse 5'&gt;...&gt;3'</b> | <b>Reference</b> |
|---------------|---------------------------------------|---------------------------------------|------------------|
| <i>efa1a</i>  | cttctcaggctgactgtgc                   | ccgctagcattaccctcc                    | (1)              |
| <i>cycld1</i> | cgtgtcaggaacagatcgag                  | tcaaatgttaatgtctctgacgt               | (2)              |
| <i>wnt11</i>  | cacaacaatgctgttggcagacaggtg           | ggagatgggtgctgatgtcttgaagacc          | (3)              |
| <i>cdh2</i>   | acaagaagcagaagtgtgtgagc               | agcgtagggtccagcgttg                   | (4)              |
| <i>foxd3</i>  | gcttccagctctcagctaagtccaag            | accccgatgatgtttctatgctg               | (4)              |
| <i>sox2</i>   | gaacaccaactctcgggaaacaacc             | tgtgcattttggggttctctgtg               | (4)              |
| <i>cfos</i>   | tgacctggagccgctttgc                   | ggtaggtgaacatgaaggaagacg              | (4)              |
| <i>gata2</i>  | tccttcttctccgacatccacc                | gctccacagttcacacattcacg               | (4)              |
| <i>erk2</i>   | gttgaagacgcgacacttga                  | acaggtttgatggcttcagg                  | (5)              |
| <i>jnk</i>    | acaggaataagcgcgagaaa                  | tggtcatacgtgagcagac                   | (5)              |
| <i>p38a</i>   | actcgcattccaagcagact                  | gttgctctgcaaacgctcaa                  | (5)              |
| <i>ntl</i>    | agacgaatgtttcccgtgct                  | cttctctctttggcatcgag                  | (6)              |
| <i>gsc</i>    | gtcactatgaaggacactcgtgc               | ttgttctctgtttcaggcgac                 | (6)              |
| <i>p21</i>    | atgcagctccagacagatga                  | cgcaaacagaccaacatcac                  | (7)              |
| <i>p27</i>    | tgaagcctggaacttcgact                  | tgtgaatatcggagcccttc                  | (7)              |

**References**

1. McCurley, A. T., and Callard, G. V. (2008) *BMC Mol Biol* **9**, 102
2. Miyake, A., Nihno, S., Murakoshi, Y., Satsuka, A., Nakayama, Y., and Itoh, N. (2012) *Mech Dev* **128**, 577-590
3. Seo, J., Asaoka, Y., Nagai, Y., Hirayama, J., Yamasaki, T., Namae, M., Ohata, S., Shimizu, N., Negishi, T., Kitagawa, D., Kondoh, H., Furutani-Seiki, M., Penninger, J. M., Katada, T., and Nishina, H. (2010) *J Cell Biochem* **110**, 1022-1037
4. Krens, S. F., Corredor-Adamez, M., He, S., Snaar-Jagalska, B. E., and Spaink, H. P. (2008) *BMC Genomics* **9**, 196
5. Shi, X., and Zhou, B. (2010) *Toxicol Sci* **115**, 391-400
6. Rios, Y., Melmed, S., Lin, S., and Liu, N. A. (2011) *PLoS Genet* **7**, e1001271
7. Yee, S. N., Zhou, W., Chun, S. G., Liang, I., and Yee, R. K. (2012) *Biology Open* doi: 10.1242/bio.2012539
