# Supplementary material for: Kcnh1 Voltage-gated Potassium Channels Are Essential for Early Zebrafish Development
Source: PubMed Central journal article supplement — J Biol Chem. 2012 Aug 27;287(42):35565–75. doi: 10.1074/jbc.M112.363978 (PMC3471731; doi:10.1074/jbc.m112.363978), 2012-08-27
Supplement: supp_M112.363978_jbc.M112.363978-3.pdf [file supp_M112.363978_jbc.M112.363978-3.pdf]

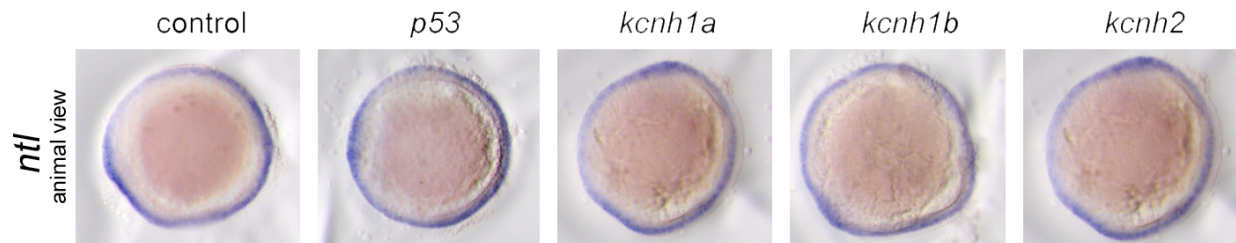

**Figure S2** Analysis of early patterning using the axial mesoderm marker *no tail* (*ntl*). *Kcnh1* morphants showed no differences compared to controls (uninjected, *p53* morphants, *kcnh2* morphants) regarding the expression pattern of *ntl* positive cells along the marginal cell layer (5 hpf). Images are top views on the animal pole of representative embryos with the marginal cell layer in the focal plane.
